# Supplementary material for: Donor positional inversion in carbazole–cyanostilbene conjugates: reorienting connectivity for solid-state color modulation
Source: Royal Society of Chemistry journal article supplement (doi:10.1039/d5ma00978b), 2025-11-13
Supplement: d5ma00978b1.pdf [file d5ma00978b1.pdf]

## **Donor Positional Inversion in Carbazole-Cyanostilbene Conjugates: Reorienting Connectivity for Solid-State Color Modulation**

Afrin A<sup>a</sup>, Adithyamol U<sup>a</sup> and Chinna Ayya Swamy P<sup>a\*</sup>

<sup>a</sup>Main group Organometallics Optoelectronic Materials and Catalysis lab, Department of Chemistry, National Institute of Technology, Calicut, India-673601.

Corresponding author: [swamy@nitc.ac.in](mailto:swamy@nitc.ac.in)

### **Table of Contents**

|                                            |            |
|--------------------------------------------|------------|
| <b>1. Materials and Measurements</b>       | <b>S2</b>  |
| <b>2. Experimental Section</b>             | <b>S3</b>  |
| <b>3. Characterisation Data</b>            | <b>S4</b>  |
| <b>4. SCXRD</b>                            | <b>S6</b>  |
| <b>5. Optical Properties</b>               | <b>S7</b>  |
| <b>6. SEM images</b>                       | <b>S8</b>  |
| <b>7. Dynamic Light Scattering studies</b> | <b>S8</b>  |
| <b>8. VT-PXRD</b>                          | <b>S9</b>  |
| <b>9. DFT data</b>                         | <b>S9</b>  |
| <b>10. Thermal properties</b>              | <b>S12</b> |
| <b>11. References</b>                      | <b>S12</b> |

## 1. Materials and Measurements

The starting material for the synthetic scheme Anthracene, carbazole and the chemicals including bromohexane, bis(pinacolato)diboron, triphenylphosphine, dichlorobis(triphenylphosphine)palladium(II), tetrakis(triphenylphosphine)palladium(0), 2-(4-bromophenyl)acetonitrile, N-Bromosuccinimide, KOAc, NaOH, K<sub>2</sub>CO<sub>3</sub>, dimethylformamide, phosphorus oxychloride, dichloroethane, chloroform, tetrahydrofuran and methanol were purchased and used as received. DMF and Toluene was dried by storing it over 4 Å molecular sieves that had been activated by heating in a preheated 150 °C oven. Dichloroethane were dried over CaH<sub>2</sub>, distilled and subsequently stored over 4 Å molecular sieves. Reactions sensitive to oxygen or moisture were conducted under a nitrogen atmosphere. Reflux reactions were carried out using a heating reaction block equipped with a temperature-controlled probe. All chromatographic purifications were done using silica gel (100–200 mesh). The <sup>1</sup>H, <sup>13</sup>C NMR, spectra of the synthesized compounds were recorded on a JEOL JNM-ECZ-500R/M1 (500 MHz) NMR spectrometer, using CDCl<sub>3</sub> as the solvent and tetramethylsilane (TMS) as an internal reference. High-resolution mass spectrometry (HRMS) data were acquired on a Waters Synapt XS spectrometer in positive ion mode, with a fragmentor voltage of 3.01 kV, cone voltage of 35 V, source offset of 4.0 V, source temperature of 120 °C, and cone gas flow rate of 50 L/h, and the ion values are reported as m/z. UV-visible absorption spectra were measured using a SHIMADZU-2600 spectrophotometer, maintaining a slit width of 2 nm. Fluorescence measurements were conducted on a PerkinElmer 6500 fluorescence spectrometer, with excitation and emission slit widths set at 5 nm and 20 nm for liquid and 20 and 20 for solid, respectively. Data for SCXRD were collected on a Bruker D8 QUEST KAPPA diffractometer equipped with a PHOTON III C14 CPAD detector using Mo K $\alpha$  radiation ( $\lambda$  = 0.71073 Å) at 100(2) K. The structure was solved by Intrinsic Phasing (SHELXT-2018/2) and refined by full-matrix least-squares on F<sup>2</sup> (SHELXL-2019/2); all non-hydrogen atoms were refined anisotropically. X-ray diffraction (XRD) and VT-PXRD patterns in the 2 $\theta$  range of 5° to 50° were recorded on a Rigaku SmartLab SE employing a CuK $\alpha$  radiation source ( $\lambda$  = 1.5406 Å). Scanning electron microscopy (SEM) images were obtained using a ZEISS Gemini Sigma 300 instrument, while dynamic light scattering (DLS) measurements of aggregates were performed on the STABINO ZETA analyzer. Density functional theory (DFT) calculations were carried out at the B3LYP/6-31G(d,p) level using the Gaussian 09W software package. Thermogravimetric analysis (TGA) was performed on a TGAQ50V20.13 Build39 instrument,

and differential scanning calorimetry (DSC) curves were recorded using a DSC Q20 V24.11 Build 124 model. Absolute quantum yields were determined using an integrating sphere.

## 2. Experimental Section

The compounds **1-4** were synthesized accordingly from our previous study.<sup>1</sup>

### Synthesis of (Z)-3-(anthracen-9-yl)-2-(4-bromophenyl)acrylonitrile (**5**)

Anthracene-9-carbaldehyde (1.00 g, 4.85 mmol) was dissolved in methanol (50 mL) in a 100 ml round-bottom flask. Sodium hydroxide (780 mg, 19.42 mmol) was added to the suspension, followed by the portionwise addition of 2-(4-bromophenyl)acetonitrile (1.43 g, 7.28 mmol). The reaction mixture was stirred at 65 °C until complete consumption of the aldehyde, as monitored by thin-layer chromatography (TLC). Upon completion, the hot mixture was filtered to isolate the precipitated product, which was washed with hot methanol and dried under vacuum to obtain the pure product (1.86 g, 88 %). <sup>1</sup>H NMR (500 MHz, CDCl<sub>3</sub>) δ 8.52 (s, 1H), 8.36 (s, 1H), 8.05 (d, *J* = 7.8 Hz, 2H), 8.01 (d, *J* = 8.6 Hz, 2H), 7.72 (d, *J* = 8.6 Hz, 2H), 7.66 (d, *J* = 8.5 Hz, 2H), 7.56 – 7.50 (m, 4H).

### Synthesis of (Z)-3-(anthracen-9-yl)-2-(4-(9-hexyl-9H-carbazol-3-yl)phenyl)acrylonitrile (**AN-CZ-CS**)

In a 100 mL Schlenk flask, a mixture of (Z)-3-(anthracen-9-yl)-2-(4-bromophenyl)acrylonitrile (500 mg, 1.31 mmol), 9-hexyl-3-(4,4,5,5-tetramethyl-1,3,2-dioxaborolan-2-yl)-9H-carbazole (590 mg, 1.56 mmol), and potassium carbonate (2 M aqueous solution, 5 mL) was dissolved in tetrahydrofuran (60 mL). The reaction mixture was degassed by bubbling nitrogen gas for 30 minutes. Subsequently, tetrakis(triphenylphosphine)palladium(0) (Pd(PPh<sub>3</sub>)<sub>4</sub>, 15 mg, 0.013 mmol) was added under a nitrogen atmosphere. The reaction was refluxed for 24 hours under an inert atmosphere. Upon completion, the mixture was cooled to room temperature, and solvents were removed under reduced pressure. The resulting residue was extracted with dichloromethane and water. The organic layer was separated, dried over anhydrous sodium sulfate, and concentrated under vacuum to yield the crude product. The crude product was purified using flash column chromatography using DCM as the eluent. The final product was obtained by washing the solid with hot methanol and further washing with hexane, affording the purified compound as a yellow solid (390 mg, 54 %). <sup>1</sup>H NMR (500 MHz, CDCl<sub>3</sub>) δ 8.55 (s, 1H), 8.46 (s, 1H), 8.42 (s, 1H), 8.22 (d, *J* = 7.7 Hz, 1H), 8.12 (d, *J* = 8.4 Hz, 2H), 8.08 (d, *J* = 8.0 Hz, 2H), 7.99 (d, *J* = 8.2 Hz, 2H), 7.90 (d, *J* = 8.3 Hz, 2H), 7.81 (d, *J* = 8.4 Hz, 1H), 7.59

– 7.55 (m, 3H), 7.54 – 7.50 (m, 3H), 7.46 (d,  $J = 8.2$  Hz, 1H), 7.31 (t,  $J = 7.4$  Hz, 1H), 4.33 (t,  $J = 7.1$  Hz, 2H), 1.95 – 1.88 (m, 2H), 1.47 – 1.40 (m, 2H), 1.39 – 1.30 (m, 4H), 0.91 (t,  $J = 6.8$  Hz, 3H).  $^{13}\text{C}\{^1\text{H}\}$  NMR (126 MHz,  $\text{CDCl}_3$ )  $\delta$  144.1, 141.4, 140.8, 139.6, 131.7, 131.6, 131.2, 130.0, 129.6, 129.4, 128.5, 128.3, 127.1, 127.0, 126.5, 126.0, 125.6, 125.4, 123.9, 123.3, 121.4, 121.0, 119.6, 119.3, 117.1, 109.6, 109.4, 43.7, 32.1, 29.4, 27.5, 23.0, 14.5. HRMS-ESI Calcd. for  $[\text{M}+\text{H}]^+$   $\text{C}_{41}\text{H}_{34}\text{N}_2$  Exact Mass: 554.2713; Found 554.2722.

### 3. Characterisation Data

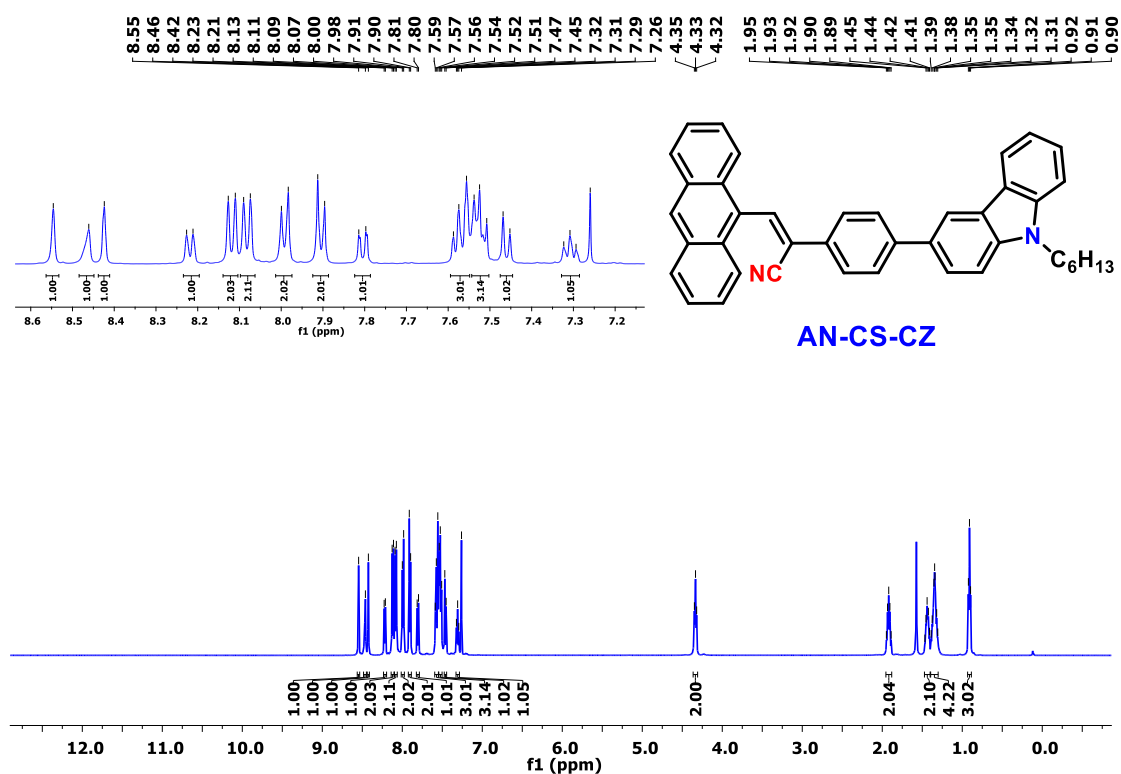

Figure S1.  $^1\text{H}$  NMR spectrum (500 MHz) of AN-CS-CS in  $\text{CDCl}_3$

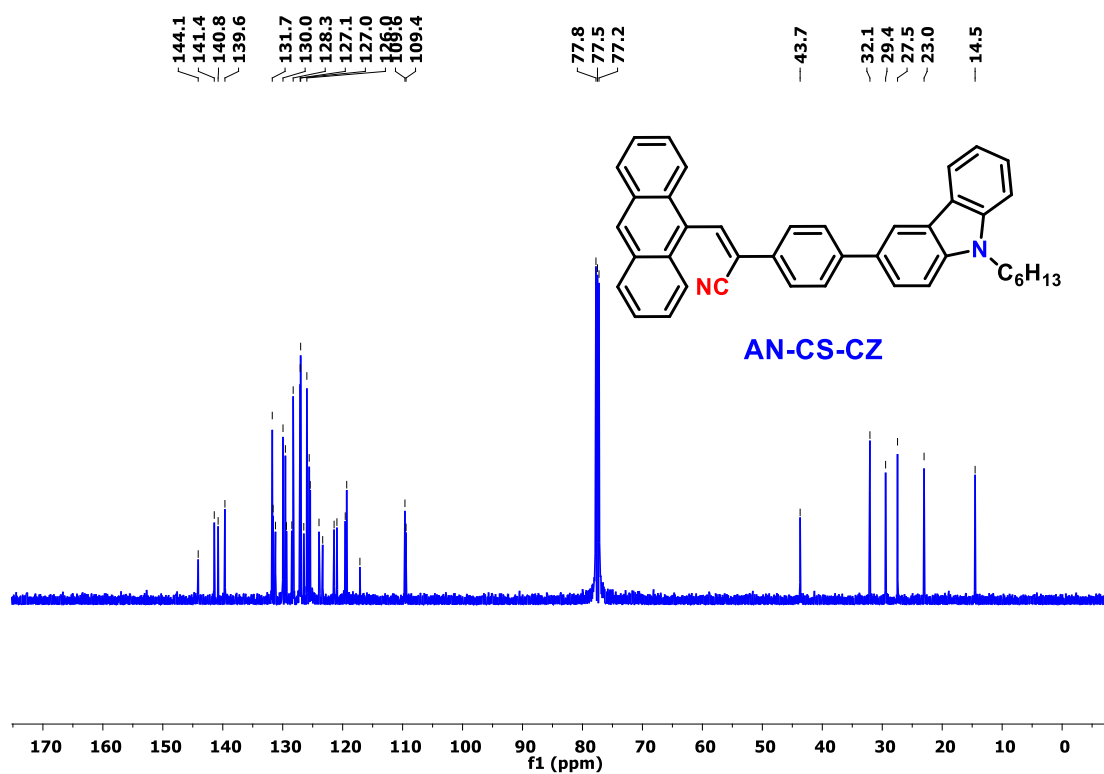

**Figure S2.**  $^{13}\text{C}\{^1\text{H}\}$  NMR spectrum (126 MHz) of AN-CS-CZ in  $\text{CDCl}_3$ .

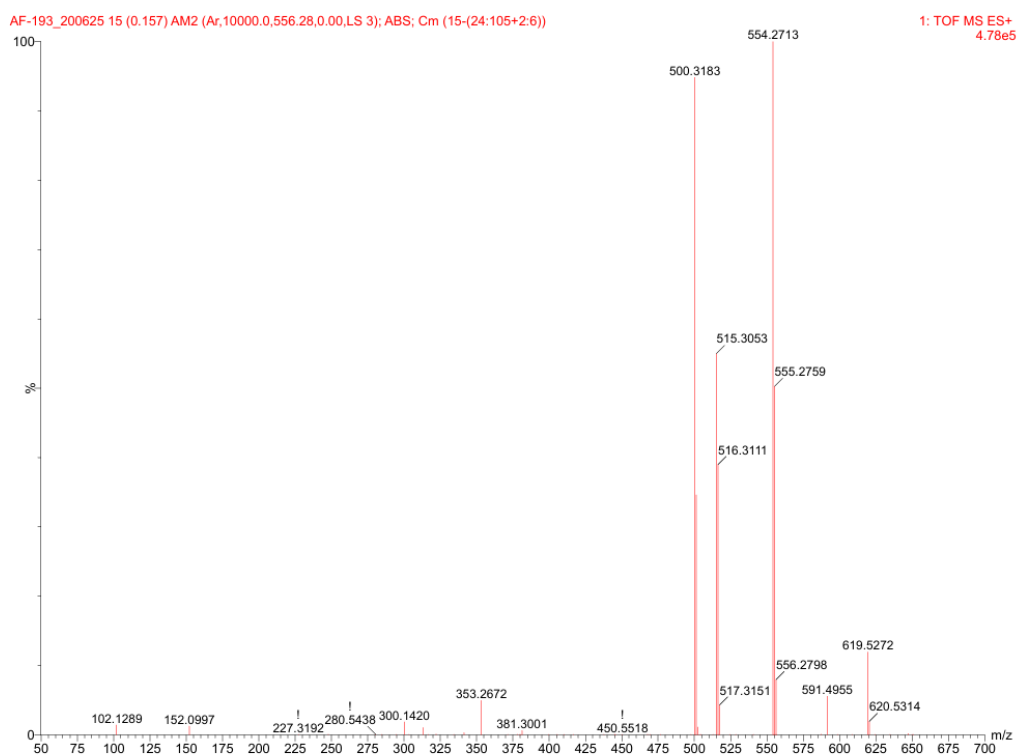

**Figure S3.** HRMS Spectra of compound AN-CS-CZ.

#### 4. SCXRD Data

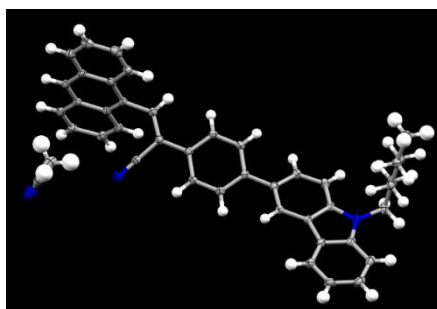

**Figure S4.** ORTEP diagram of compound AN-CS-CZ with ellipsoids shown at the 50% probability level.

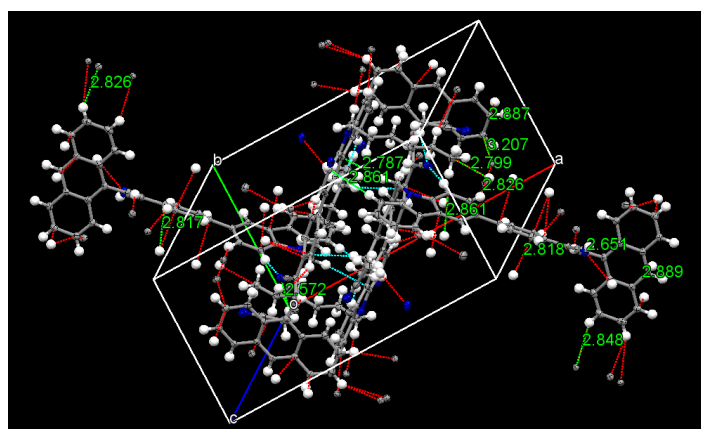

**Figure S5.** Interactions present in the crystal structure AN-CS-CZ.

**Table S1.** Refined SCXRD data parameters of compound AN-CS-CZ

|                                           |                                                |
|-------------------------------------------|------------------------------------------------|
| CCDC number                               | 2500771                                        |
| Empirical formula                         | C <sub>43</sub> H <sub>37</sub> N <sub>3</sub> |
| Formula weight                            | 595.75                                         |
| Temperature [K]                           | 100(2)                                         |
| Crystal system                            | monoclinic                                     |
| Space group (number)                      | $P2_1/n$ (14)                                  |
| $a$ [Å]                                   | 18.2101(8)                                     |
| $b$ [Å]                                   | 10.0951(4)                                     |
| $c$ [Å]                                   | 18.8354(9)                                     |
| $\alpha$ [°]                              | 90                                             |
| $\beta$ [°]                               | 111.661(2)                                     |
| $\gamma$ [°]                              | 90                                             |
| Volume [Å <sup>3</sup> ]                  | 3218.1(2)                                      |
| $Z$                                       | 4                                              |
| $\rho_{\text{calc}}$ [gcm <sup>-3</sup> ] | 1.23                                           |
| $\mu$ [mm <sup>-1</sup> ]                 | 0.072                                          |
| $F(000)$                                  | 1264                                           |

|                                              |                                                                  |
|----------------------------------------------|------------------------------------------------------------------|
| Crystal size [mm <sup>3</sup> ]              | 0.04×0.1×0.251                                                   |
| Crystal colour                               | yellow                                                           |
| Crystal shape                                | block                                                            |
| Radiation                                    | Mo K <sub>α</sub> (λ=0.71073 Å)                                  |
| 2θ range [°]                                 | 3.92 to 56.73 (0.75 Å)                                           |
| Index ranges                                 | −24 ≤ h ≤ 24<br>−13 ≤ k ≤ 13<br>−25 ≤ l ≤ 25                     |
| Reflections collected                        | 77474                                                            |
| Independent reflections                      | 8017<br>$R_{\text{int}} = 0.0429$<br>$R_{\text{sigma}} = 0.0231$ |
| Completeness to<br>$\theta = 25.242^\circ$   | 99.9                                                             |
| Data / Restraints /<br>Parameters            | 8016 / 0 / 417                                                   |
| Goodness-of-fit on $F^2$                     | 1.019                                                            |
| Final $R$ indexes<br>[ $I \geq 2\sigma(I)$ ] | $R_1 = 0.0424$<br>$wR_2 = 0.1077$                                |
| Final $R$ indexes<br>[all data]              | $R_1 = 0.0497$<br>$wR_2 = 0.1152$                                |
| Largest peak/hole [eÅ <sup>−3</sup> ]        | 0.31/−0.26                                                       |

## 5. Optical Properties

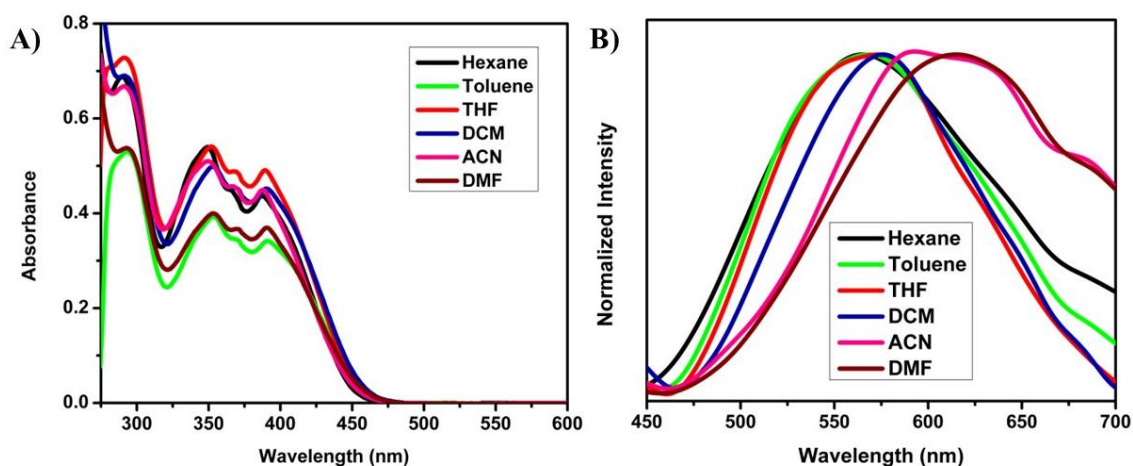

**Figure S6.** (A) Absorption and (B) Normalized emission spectra of compound AN-CS-CZ in different polarity of solvents. (Con.  $3 \times 10^{-5}$  M;  $\lambda_{\text{ex}} = 385$  nm).

**Table S2.** Photophysical properties of compounds AN-CS-CZ in different polarity of solvents. ( $\lambda_{\text{ex}} = 385$  nm).

| Compounds | Solvents | $\lambda_{\text{max}}^{[\text{a}]}$ (nm) | $\lambda_{\text{max}}^{[\text{b}]}$ (nm) | $\Delta\nu$ [e] |
|-----------|----------|------------------------------------------|------------------------------------------|-----------------|
|           | Hexane   | 388                                      | 560                                      | 7916            |

|          |         |     |     |      |
|----------|---------|-----|-----|------|
| AN-CS-CZ | Toluene | 391 | 568 | 7969 |
|          | THF     | 389 | 572 | 8224 |
|          | DCM     | 390 | 575 | 8249 |
|          | ACN     | 388 | 603 | 9189 |
|          | DMF     | 390 | 617 | 9433 |

[a] peak position of the maximum absorption band in nm. [b] Peak position of emission maxima in nm [c] Stokes shift in  $\text{cm}^{-1}$ .

## 6. SEM images

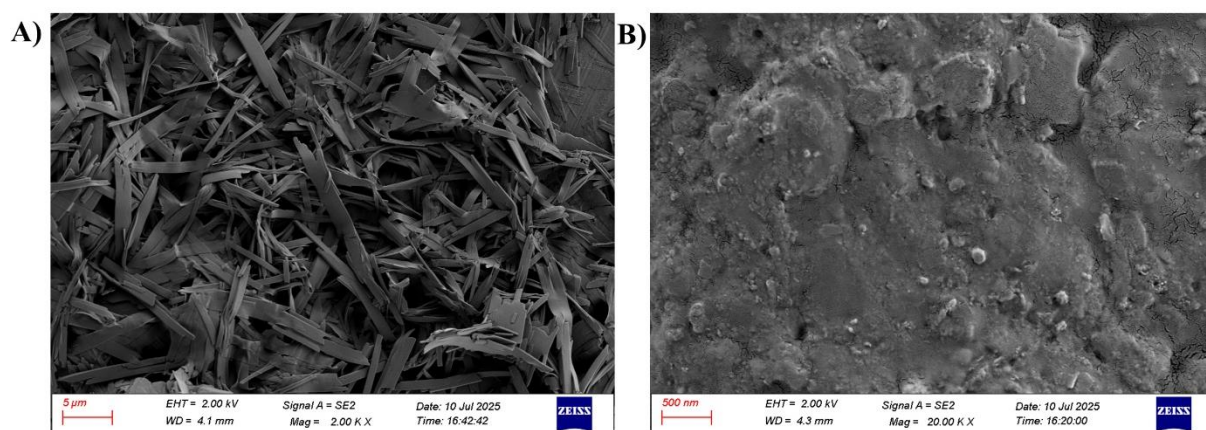

**Figure S7.** SEM images of (A) aggregates of AN-CS-CZ (drop-casted from a  $3 \times 10^{-5}$  M ACN/ $\text{H}_2\text{O}$  solution with  $f_w = 50$  %) (B) AN-CS-CZ (drop-casted from a  $3 \times 10^{-5}$  M ACN/ $\text{H}_2\text{O}$  solution with  $f_w = 90$  %).

## 7. Dynamic light Scattering studies

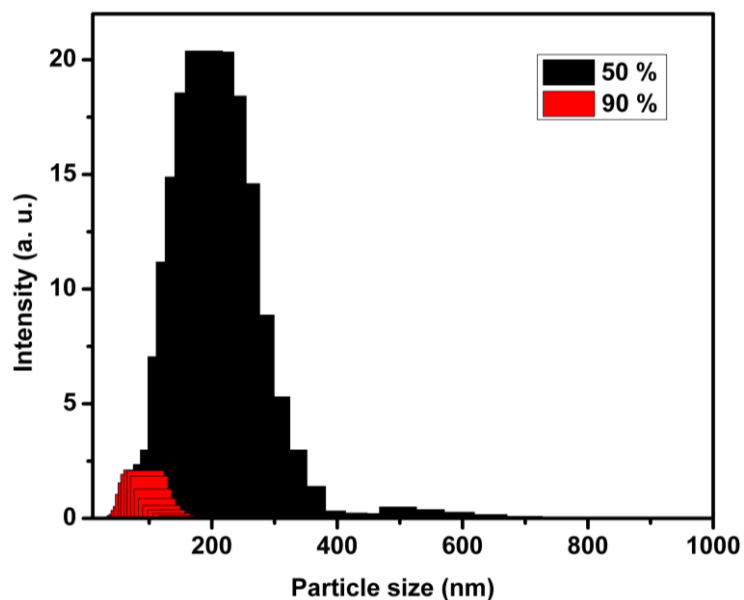

**Figure S8.** Size distributions of the aggregates of AN-CS-CZ (drop casted from a  $3 \times 10^{-5}$  M ACN/ $\text{H}_2\text{O}$  solution with  $f_w = 50$  % & 90 %).



## 8. VT-PXRD Studies

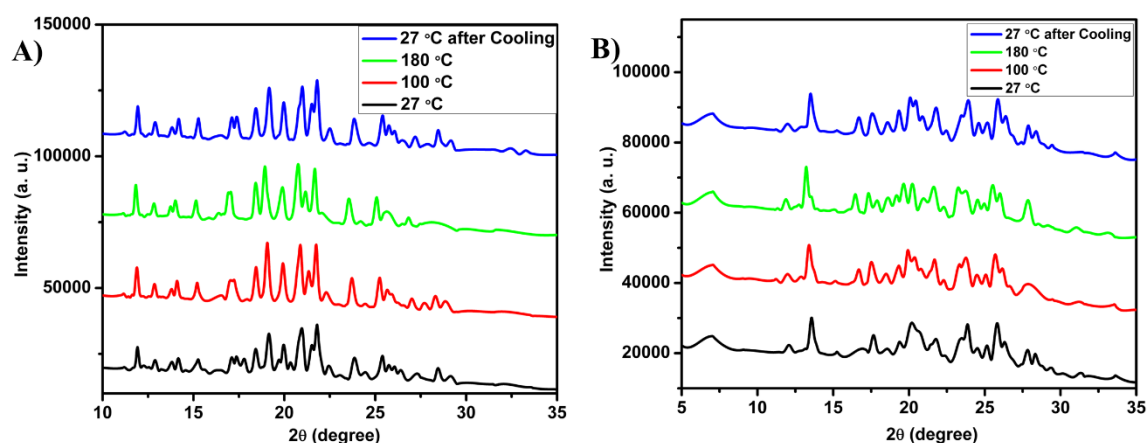

**Figure S9.** X-ray diffraction experiments at different temperatures of compound (A) D-D-A our previous study and (B) AN-CS-CZ.

## 9. DFT Data

**Table S3.** Compound AN-CS-CZ

|   |              |              |              |
|---|--------------|--------------|--------------|
| 6 | -7.125516000 | 2.989999000  | 1.986929000  |
| 6 | -8.544195000 | 2.892716000  | 2.021687000  |
| 6 | -9.164554000 | 1.789234000  | 1.500327000  |
| 6 | -8.409070000 | 0.718325000  | 0.930550000  |
| 6 | -6.969485000 | 0.802791000  | 0.909170000  |
| 6 | -6.366792000 | 1.985883000  | 1.441455000  |
| 6 | -9.036547000 | -0.405029000 | 0.383614000  |
| 6 | -8.305954000 | -1.463153000 | -0.162387000 |
| 6 | -6.860834000 | -1.405933000 | -0.173930000 |
| 6 | -6.207664000 | -0.255589000 | 0.343988000  |
| 6 | -8.966437000 | -2.615120000 | -0.693801000 |
| 6 | -8.254028000 | -3.673814000 | -1.185560000 |
| 6 | -6.831550000 | -3.642574000 | -1.157759000 |
| 6 | -6.161271000 | -2.552547000 | -0.668270000 |
| 6 | -4.738777000 | -0.142356000 | 0.386770000  |
| 6 | -3.856541000 | -0.202256000 | -0.645088000 |
| 6 | -2.384721000 | -0.110879000 | -0.470643000 |
| 6 | -1.564563000 | 0.372882000  | -1.503733000 |
| 6 | -0.190590000 | 0.494105000  | -1.329541000 |
| 6 | 0.429440000  | 0.136516000  | -0.119706000 |
| 6 | -0.394177000 | -0.365460000 | 0.904120000  |

|   |               |              |              |
|---|---------------|--------------|--------------|
| 6 | -1.766739000  | -0.495370000 | 0.731504000  |
| 6 | 1.893246000   | 0.277182000  | 0.068690000  |
| 6 | 2.616080000   | -0.676969000 | 0.823180000  |
| 6 | 3.987133000   | -0.576961000 | 1.030273000  |
| 6 | 4.658454000   | 0.514387000  | 0.470317000  |
| 6 | 3.962813000   | 1.484999000  | -0.299434000 |
| 6 | 2.586324000   | 1.358609000  | -0.492767000 |
| 7 | 6.000395000   | 0.862240000  | 0.540727000  |
| 6 | 6.192370000   | 2.034725000  | -0.185246000 |
| 6 | 4.946936000   | 2.461873000  | -0.718165000 |
| 6 | 7.368572000   | 2.757083000  | -0.407639000 |
| 6 | 7.280571000   | 3.922660000  | -1.165918000 |
| 6 | 6.055475000   | 4.361067000  | -1.696621000 |
| 6 | 4.887686000   | 3.635834000  | -1.477072000 |
| 6 | -4.332688000  | -0.290096000 | -1.999754000 |
| 7 | -4.666573000  | -0.336565000 | -3.113582000 |
| 6 | 11.337724000  | -4.578800000 | 0.162346000  |
| 6 | 10.613240000  | -3.538241000 | 1.021324000  |
| 6 | 9.538715000   | -2.760478000 | 0.252077000  |
| 6 | 8.814914000   | -1.713254000 | 1.107706000  |
| 6 | 7.734651000   | -0.939336000 | 0.343894000  |
| 6 | 7.039299000   | 0.109777000  | 1.224367000  |
| 1 | -6.640513000  | 3.875631000  | 2.386742000  |
| 1 | -9.128823000  | 3.699865000  | 2.452534000  |
| 1 | -10.248178000 | 1.707142000  | 1.507503000  |
| 1 | -5.289225000  | 2.098692000  | 1.394854000  |
| 1 | -10.122607000 | -0.460462000 | 0.389948000  |
| 1 | -10.053011000 | -2.630811000 | -0.689167000 |
| 1 | -8.766226000  | -4.543547000 | -1.585676000 |
| 1 | -6.271075000  | -4.496411000 | -1.526383000 |
| 1 | -5.078930000  | -2.560460000 | -0.643894000 |
| 1 | -4.311683000  | 0.065064000  | 1.366030000  |
| 1 | -2.009456000  | 0.651814000  | -2.453861000 |
| 1 | 0.417025000   | 0.850182000  | -2.155637000 |
| 1 | 0.047383000   | -0.647297000 | 1.855019000  |

|   |              |              |              |
|---|--------------|--------------|--------------|
| 1 | -2.362163000 | -0.914526000 | 1.536600000  |
| 1 | 2.088336000  | -1.534250000 | 1.229016000  |
| 1 | 4.511659000  | -1.337499000 | 1.599612000  |
| 1 | 2.045062000  | 2.114362000  | -1.053964000 |
| 1 | 8.322763000  | 2.426709000  | -0.009955000 |
| 1 | 8.180453000  | 4.501554000  | -1.351913000 |
| 1 | 6.022389000  | 5.273019000  | -2.284498000 |
| 1 | 3.942377000  | 3.976683000  | -1.889759000 |
| 1 | 12.095199000 | -5.117389000 | 0.740719000  |
| 1 | 10.636850000 | -5.319814000 | -0.238437000 |
| 1 | 11.842305000 | -4.108599000 | -0.689261000 |
| 1 | 11.344959000 | -2.830919000 | 1.434929000  |
| 1 | 10.150702000 | -4.034673000 | 1.885257000  |
| 1 | 8.803169000  | -3.466848000 | -0.158055000 |
| 1 | 9.998952000  | -2.265832000 | -0.614912000 |
| 1 | 9.552321000  | -1.005593000 | 1.513350000  |
| 1 | 8.361397000  | -2.208382000 | 1.978470000  |
| 1 | 6.980023000  | -1.633047000 | -0.047473000 |
| 1 | 8.175359000  | -0.437861000 | -0.526778000 |
| 1 | 7.773462000  | 0.824881000  | 1.611987000  |
| 1 | 6.587277000  | -0.369713000 | 2.099517000  |

**Table S4.** DFT data of compound **AN-CS-CZ**

| <b>Compound</b> | <b>HOMO-1 (eV)</b> | <b>HOMO (eV)</b> | <b>LUMO (eV)</b> | <b>LUMO+1 (eV)</b> | <b>HOMO-LUMO (eV)</b> | <b>HOMO-1-LUMO (eV)</b> |
|-----------------|--------------------|------------------|------------------|--------------------|-----------------------|-------------------------|
| <b>AN-CS-CZ</b> | -5.40              | -5.19            | -2.1             | -1.33              | 3.09                  | 3.31                    |

## 10. Thermal properties

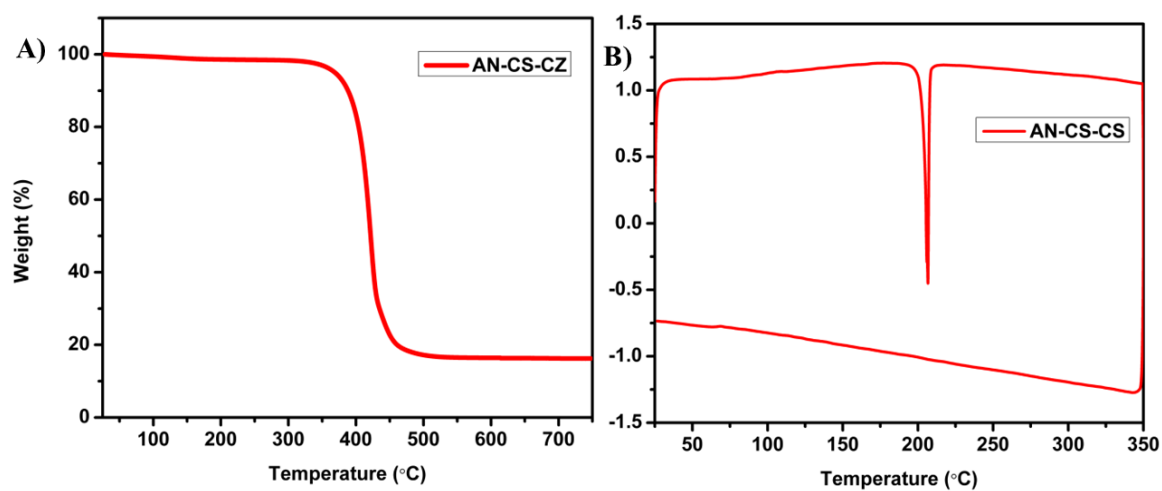

**Figure S10.** (A) TGA and (B) DSC curves of the compound.

## 11. References

1. Afrin, A.; Swamy, P, C. A. Aggregation induced emission and reversible mechanofluorochromism active carbazole–anthracene conjugated cyanostilbenes with different terminal substitutions. *New J. Chem.* **2023**, 47, pp.18919-18932.
